# Supplementary material for: High-dimensional analysis of intestinal immune cells during helminth infection
Source: eLife. 2020 Feb 11;9:e51678. doi: 10.7554/eLife.51678 (PMC7012606; doi:10.7554/eLife.51678)
Supplement: Supplementary file 1. — Antibodies used for the high-dimensional analysis of intestinal immune cells are listed by channel, emission, marker, fluorochrome, clone, company, catalog ID, optimal staining dilution and working concentration. [file elife-51678-supp1.xlsx]

## Sheet: Sheet1
	Channel	Emission	Marker	Fluorophore	Clone	Company	Catalog ID	optimal staining dilution	working conc. (µg/ml)
1	V1	421	CD3	BV421	145-2C11	BD	562600	1:100	2
2	V3	450	CD103	eFluor450	2E7	Thermofisher	48-1031-82	1:100	2
3	V4	480	ki67	BV480	B56	BD	566109	1:200	0.01
4	V5	510	Ep-CAM(CD326)	BV510	G8.8	Biolegend	118231	1:400	2
5	V9	570	Ly6C	BV570	HK1.4	Biolegend	128030	1:200	2
6	V10	605	MHCII	BV605	M5/114.15.2	BD	563413	1:400	2
7	V11	650	CD11c	BV650	N418	Biolegend	117339	1:100	2
8	V13	705	DCAMKL1	primary	polyclonal	Abcam	Ab31704	1:4000	10
				Qdot705		Thermofisher	Q-11461MP	1:4000	10
9	V14	750	CD45	BV750	30-F11	Biolegend	103157	1:1000	2
10	V16	786	Siglec-F	BV786	E50-2440	BD	740956	1:200	2
11	B2	520	CD19	AF488	6D5	BioLegend	115521	1:200	5
12	B3	550	FoxP3	AF532	FJK-16s	ThermoFisher	58-5773-82	1:100	2
13	B5	576	Tbet	PE	4B10	BioLegend	644809	1:100	2
14	B6	610	RORyt	PE-CF594	Q31-378	BD	562684	1:100	2
15	B8	668	CD127	PECy5	A7R34	BioLegend	135016	1:100	2
16	B9	680	CD11b	PErCp Cy5.5	M1/70	BD	550993	1:100	2
17	B10	730	CD4	PerCP eFluor 710	RM4-5	ThermoFisher	46-0042-82	1:1200	2
18	B14	780	CD64	PE-Cy7	X54-5/7.1	BioLegend	139314	1:100	2
19	R2	660	RELMa	APC	DS8RELM	ThermoFisher	17-5441-82	1:100	2
20	R2	668	GATA3	AF647	L50-823	BD	560068	1:200	2
21	R5	720	Ly6G	AF700	1A8	Biolegend	127622	1:300	5
22	R8	746	ZOMBIE NIR	Viability dye	-	Biolegend	423106	1:1000
23	R8	780	CD90.2	APC-CY7	30-H12	Biolegend	105328	1:800	2
